# Supplementary material for: Variation in Cause-Specific Mortality Rates in Italy during the First Wave of the COVID-19 Pandemic: A Study Based on Nationwide Data
Source: MDPI journal article supplement (doi:10.3390/ijerph19020805), 2022-01-12
Supplement: s1 [file s1]

# Supplementary material

## Variation in Cause-Specific Mortality Rates in Italy during the First Wave of the COVID-19 Pandemic: A Study Based on Nationwide Data

Enrico Grande<sup>\*1</sup>, Ugo Fedeli<sup>2</sup>, Marilena Pappagallo<sup>1</sup>, Roberta Crialesi<sup>1</sup>, Stefano Marchetti<sup>1</sup>, Giada Minelli<sup>3</sup>, Ivano Iavarone<sup>4</sup>, Luisa Frova<sup>1</sup>, Graziano Onder<sup>5</sup> and Francesco Grippo<sup>1</sup>

1. Italian National Institute of Statistics, Integrated system for health, social assistance and welfare, 00198 Rome, Italy

2. Epidemiological Department, Azienda Zero, Veneto Region, 35132 Padova, Italy

3. Statistical Service, Istituto Superiore di Sanità, 00161 Rome, Italy.

4. Department of Environment and Health, Istituto Superiore di Sanità, 00161 Rome, Italy

5. Department of Cardiovascular, Endocrine-metabolic Diseases and Ageing, Istituto Superiore di Sanità, 00161 Rome, Italy

Correspondence to:

Dr. Enrico Grande

Italian National Institute of Statistics

Viale Liegi 13, 00198 Rome, Italy

Email: grande@istat.it

### Data completeness

Tables S1 and S2 show the number of deaths from the cause-of-death (CoD) register compared with the figures from the database of the demographic source, by geographical area and age class. Taking the latter as the reference, the percentage of deaths included in the CoD register is an estimate of its completeness. Nevertheless, a small difference between the two sources can be expected: the CoD register includes all deaths occurred in Italy, but not those of residents died abroad, which are instead included in the demographic source. The completeness of 2020 data is above 94% and there are only small differences by geographical area. Some differences in the completeness are observed by age groups.

**Table S1.** Comparison of the total number of deaths between CoD register and the demographic source database by geographical area.

| Area                   | March-April 2020 |                                               |                                  | March-April 2015-2019 |                                               |                                  |
|------------------------|------------------|-----------------------------------------------|----------------------------------|-----------------------|-----------------------------------------------|----------------------------------|
|                        | CoD register     | Demographic source (Daily mortality database) | CoD register/ demographic source | CoD register          | Demographic source (daily mortality database) | CoD register/ demographic source |
| Lombardy               | 41,027           | 42,968                                        | 95.5                             | 81,602                | 83,404                                        | 97.8                             |
| Other Northern regions | 48,206           | 51,405                                        | 93.8                             | 166,886               | 170,660                                       | 97.8                             |
| Rest of Italy          | 60,978           | 64,937                                        | 93.9                             | 290,057               | 296,278                                       | 97.9                             |
| Italy                  | 150,211          | 159,310                                       | 94.3                             | 538,545               | 550,342                                       | 97.9                             |

**Table S2.** Comparison of the total number of deaths between CoD register and the demographic source database by age.

| Age group (years) | March-April 2020 |                                               |                                  | March-April 2015-2019 |                                               |                                  |
|-------------------|------------------|-----------------------------------------------|----------------------------------|-----------------------|-----------------------------------------------|----------------------------------|
|                   | CoD register     | Demographic source (Daily mortality database) | CoD register/ demographic source | CoD register          | Demographic source (daily mortality database) | CoD register/ demographic source |
| < 50              | 2,699            | 3,068                                         | 88.0                             | 15,430                | 15,963                                        | 96.7                             |
| 50-64             | 10,389           | 11,024                                        | 94.2                             | 42,245                | 43,433                                        | 97.3                             |
| 65-79             | 37,811           | 40,048                                        | 94.4                             | 136,295               | 139,923                                       | 97.4                             |
| ≥ 80              | 99,312           | 105,170                                       | 94.4                             | 344,575               | 351,023                                       | 98.2                             |

### Estimation of the number of deaths by cause

The procedure consists in applying the proportion of deaths from specific causes in the CoD register to number of deaths from the demographic source stratified by geographical area, age, sex and month of death. The dataset with all deaths registered in Italy from the demographic source was downloaded by the Istat website, release of April 29<sup>th</sup>, 2021 (<https://www.istat.it/it/archivio/240401>).

Data in CoD and demographic source were stratified for the following variables:

- Province of residence
- Month of death
- Sex
- Age group, years (0-29, 30-49, 50-54, 55-59, 60-64, 65-69, 70-74, 75-79, 80-84, 85-89, 90-94, 95-99, 100 and more).

Deaths of the CoD register were further stratified by cause of death and for each cause the proportion of deaths within the stratum has been calculated. These proportions have then been multiplied by the number of deaths of the corresponding stratum in the demographic source.

$${}_cP_{p,m,s,e} = \frac{{}_cd_{p,m,s,e}}{d_{p,m,s,e}}$$

Where  $d$ : number of deaths from CoD register,  $c$ : cause of death,  $p$ : province,  $m$ : month of death,  $s$ : sex,  $e$ : age,  ${}_cP$ : proportion of death for the cause  $c$  on the total number of deaths.

$${}_c\hat{D}_{p,m,s,e} = {}_cP_{p,m,s,e} \cdot D_{p,m,s,e}$$

Where  $D$  is the number of deaths in the demographic source and  ${}_c\hat{D}$ , the estimated number of deaths for the cause  $c$  in each stratum.

When the number of deaths from the CoD register was lower than 50% of the demographic source, the proportion by cause used for the estimates was calculated at regional (larger territorial units, in Italy there are 20 regions) instead of at provincial level (in Italy there are 107 provinces).

In Table S3 the comparison between the number of deaths observed in the CoD register and the estimated number of deaths was reported.

**Table S3.** The number of deaths in the CoD register and the estimated number of deaths by cause from March 2020 to April 2020 compared with those in 2015–2019 (average).

| Causes of death                        | March-April 2020                           |       |                            |       | March-April 2015-2019 (average)            |       |                            |       |
|----------------------------------------|--------------------------------------------|-------|----------------------------|-------|--------------------------------------------|-------|----------------------------|-------|
|                                        | Number of deaths derived from CoD register |       | Estimated number of deaths |       | Number of deaths derived from CoD register |       | Estimated number of deaths |       |
|                                        | N                                          | %     | N                          | %     | N                                          | %     | N                          | %     |
| Covid-19                               | 27,650                                     | 18.4  | 29,184                     | 18.3  |                                            |       |                            |       |
| Neoplasms                              | 28,183                                     | 18.8  | 29,973                     | 18.8  | 29,326                                     | 27.2  | 30,022                     | 27.3  |
| Diseases of the circulatory system     | 42,221                                     | 28.1  | 44,782                     | 28.1  | 38,388                                     | 35.6  | 39,175                     | 35.6  |
| Diseases of the respiratory system     | 15,439                                     | 10.3  | 16,353                     | 10.3  | 9,222                                      | 8.6   | 9,417                      | 8.6   |
| Symptoms, signs and ill-defined causes | 4,498                                      | 3.0   | 4,766                      | 3.0   | 3,329                                      | 3.1   | 3,399                      | 3.1   |
| Other causes                           | 32,220                                     | 21.4  | 34,252                     | 21.5  | 27,444                                     | 25.5  | 28,056                     | 25.5  |
| Total                                  | 150,211                                    | 100.0 | 159,310                    | 100.0 | 107,709                                    | 100.0 | 110,068                    | 100.0 |

## Causes of death analysed

**Table S4.** Causes of death analyzed in the study and corresponding ICD10 codes.

| Cause of death                                         | ICD10 codes                                 |
|--------------------------------------------------------|---------------------------------------------|
| COVID-19                                               | U071-U072                                   |
| Infectious and parasitic diseases (excluding Covid-19) | A00-B99                                     |
| Neoplasms                                              | C00-D48                                     |
| Diabetes                                               | E10-E14                                     |
| Dementia and Alzheimer's disease                       | F01-F03, G30                                |
| Hypertensive diseases                                  | I10-I15                                     |
| Ischemic heart disease                                 | I20-I25                                     |
| Cerebrovascular diseases                               | I60-I69                                     |
| Other diseases of the circulatory system               | I00-I09, I26-I45, I47-I52, I70-I99          |
| Influenza and pneumonia                                | J09-J18, J849                               |
| Chronic lower respiratory diseases                     | J40-J47                                     |
| Other diseases of the respiratory system               | J00-J06, J20-J39, J60-J848, J85-J99         |
| Symptoms, signs and ill-defined diseases               | R00-R99, I46                                |
| Transport accidents                                    | V00-V99                                     |
| Accidental falls                                       | W00-W19                                     |
| Suicide                                                | X60-X84                                     |
| Other external causes                                  | W20-X59, X85-Y98                            |
| Other causes                                           | D50-E07, E15-E90, F04-G26, G31-H95, K00-Q98 |
| All causes excluding COVID-19                          | A00-Y98 excluding U071-U072                 |
| All causes                                             |                                             |

**Table S5.** Age-standardized mortality rates from March 2020 to April 2020 by age and gender compared with those in 2015–2019 (values per 100,000 residents).

| Cause of death                           | Age class (years) |           |       |           |       |           |        |           |
|------------------------------------------|-------------------|-----------|-------|-----------|-------|-----------|--------|-----------|
|                                          | <50               |           | 50-64 |           | 65-79 |           | ≥ 80   |           |
|                                          | 2020              | 2015-2019 | 2020  | 2015-2019 | 2020  | 2015-2019 | 2020   | 2015-2019 |
| (Males)                                  |                   |           |       |           |       |           |        |           |
| COVID-19                                 | 1.3               |           | 25.9  |           | 156.5 |           | 537.1  |           |
| Neoplasms                                | 2.8               | 2.9       | 36.3  | 40.0      | 157.2 | 170.5     | 436.2  | 450.6     |
| Diabetes                                 | 0.1               | 0.1       | 3.1   | 2.5       | 18.4  | 14.3      | 95.9   | 67.8      |
| Dementia and Alzheimer's disease         |                   | 0.0       | 0.3   | 0.3       | 10.7  | 7.9       | 139.2  | 107.2     |
| Hypertensive diseases                    | 0.1               | 0.1       | 2.0   | 2.0       | 14.1  | 10.1      | 163.8  | 126.1     |
| Ischemic heart disease                   | 0.6               | 0.7       | 8.3   | 10.0      | 42.9  | 42.5      | 276.8  | 267.1     |
| Cerebrovascular diseases                 | 0.4               | 0.3       | 3.6   | 3.2       | 25.4  | 23.0      | 207.0  | 206.5     |
| Other diseases of the circulatory system | 0.6               | 0.6       | 5.0   | 4.8       | 26.3  | 27.2      | 243.2  | 238.5     |
| Influenza and pneumonia                  | 0.4               | 0.1       | 3.5   | 0.8       | 30.8  | 5.7       | 160.5  | 68.2      |
| Chronic lower respiratory diseases       | 0.1               | 0.1       | 1.5   | 1.5       | 17.3  | 15.6      | 160.6  | 135.9     |
| Other diseases of the respiratory system | 0.3               | 0.1       | 1.3   | 1.1       | 8.1   | 7.8       | 62.8   | 55.9      |
| Symptoms, signs and ill-defined diseases | 0.9               | 0.9       | 3.5   | 3.2       | 8.6   | 6.9       | 82.8   | 62.1      |
| Transport accidents                      | 0.5               | 1.1       | 0.6   | 1.5       | 0.7   | 1.9       | 1.8    | 3.7       |
| Accidental falls                         | 0.1               | 0.1       | 0.4   | 0.5       | 2.8   | 2.0       | 19.2   | 14.4      |
| Suicide                                  | 1.0               | 1.1       | 1.7   | 2.5       | 2.3   | 2.8       | 4.9    | 4.5       |
| All causes excluding COVID-19            | 10.5              | 11.7      | 86.7  | 89.1      | 427.3 | 391.5     | 2375.9 | 2109.2    |
| All causes                               | 11.9              | 11.7      | 112.7 | 89.1      | 583.7 | 391.5     | 2913.0 | 2109.2    |
| (Females)                                |                   |           |       |           |       |           |        |           |
| COVID-19                                 | 0.5               |           | 6.7   |           | 53.7  |           | 302.9  |           |
| Neoplasms                                | 3.3               | 3.2       | 28.1  | 30.6      | 91.1  | 93.1      | 224.5  | 228.9     |
| Diabetes                                 | 0.1               | 0.1       | 1.3   | 1.0       | 10.3  | 8.5       | 77.6   | 58.6      |
| Dementia and Alzheimer's disease         | 0.0               | 0.0       | 0.2   | 0.3       | 10.1  | 7.7       | 177.0  | 124.7     |
| Hypertensive diseases                    | 0.1               | 0.0       | 0.6   | 0.7       | 9.0   | 7.6       | 173.1  | 133.8     |
| Ischemic heart disease                   | 0.2               | 0.1       | 1.9   | 2.1       | 14.0  | 16.1      | 169.1  | 172.2     |
| Cerebrovascular diseases                 | 0.3               | 0.2       | 1.9   | 1.9       | 17.5  | 15.3      | 198.8  | 187.2     |
| Other diseases of the circulatory system | 0.3               | 0.3       | 1.5   | 2.1       | 15.7  | 16.3      | 205.0  | 196.2     |
| Influenza and pneumonia                  | 0.1               | 0.1       | 1.2   | 0.4       | 11.1  | 3.0       | 98.2   | 40.5      |
| Chronic lower respiratory diseases       | 0.0               | 0.0       | 0.7   | 0.8       | 7.7   | 6.9       | 72.1   | 59.2      |
| Other diseases of the respiratory system | 0.1               | 0.1       | 0.7   | 0.5       | 4.6   | 3.8       | 42.1   | 34.3      |
| Symptoms, signs and ill-defined diseases | 0.3               | 0.3       | 1.3   | 1.0       | 4.5   | 3.8       | 82.7   | 60.2      |
| Transport accidents                      | 0.2               | 0.3       | 0.1   | 0.3       | 0.1   | 0.6       | 0.2    | 0.8       |
| Accidental falls                         | 0.0               | 0.0       | 0.2   | 0.1       | 1.0   | 0.8       | 10.8   | 8.5       |
| Suicide                                  | 0.2               | 0.3       | 0.5   | 0.7       | 0.5   | 0.7       | 0.5    | 0.7       |
| All causes excluding COVID-19            | 6.5               | 6.9       | 48.0  | 49.9      | 234.5 | 219.8     | 1782.8 | 1540.8    |
| All causes                               | 7.0               | 6.9       | 54.7  | 49.9      | 288.2 | 219.8     | 2085.7 | 1540.8    |

**Table S6.** Age standardized mortality rates (values per 100,000 residents) and 2020 to 2015-19 mortality rate ratios with 95% confidence intervals (CI) for all cause and all cause excluding COVID-19<sup>a</sup>.

| Sex     | Cause of death                | 2020                                 |                 | 2015-19 |                 |                         |                 |
|---------|-------------------------------|--------------------------------------|-----------------|---------|-----------------|-------------------------|-----------------|
|         |                               | Age-standardized rates (with 95% CI) |                 |         |                 | Rate ratio 2020/2015-19 |                 |
| Males   | All causes                    | 339.1                                | (336.7 - 341.6) | 244.0   | (243.0 - 245.0) | 1.390                   | (1.378 - 1.401) |
|         | All causes excluding COVID-19 | 268.2                                | (266.0 - 270.4) | 244.0   | (243.0 - 245.0) | 1.099                   | (1.089 - 1.109) |
| Females | All causes                    | 215.7                                | (214.2 - 217.2) | 163.5   | (162.9 - 164.1) | 1.319                   | (1.309 - 1.330) |
|         | All causes excluding COVID-19 | 183.0                                | (181.6 - 184.4) | 163.5   | (162.9 - 164.1) | 1.119                   | (1.110 - 1.129) |

<sup>a</sup> Mortality figures with 95% normal confidence intervals were computed using the SAS proc stdrate, assuming a Poisson distribution for the number of deaths.
